# Supplementary material
Source: HighWire-hosted journal article supplement (https://jnm.snmjournals.org/highwire/filestream/94932/field_highwire_adjunct_files/0/170134_Supplemental_Data.pdf)
Supplement: 170134_Supplemental_Data.pdf [file 170134_Supplemental_Data.pdf]

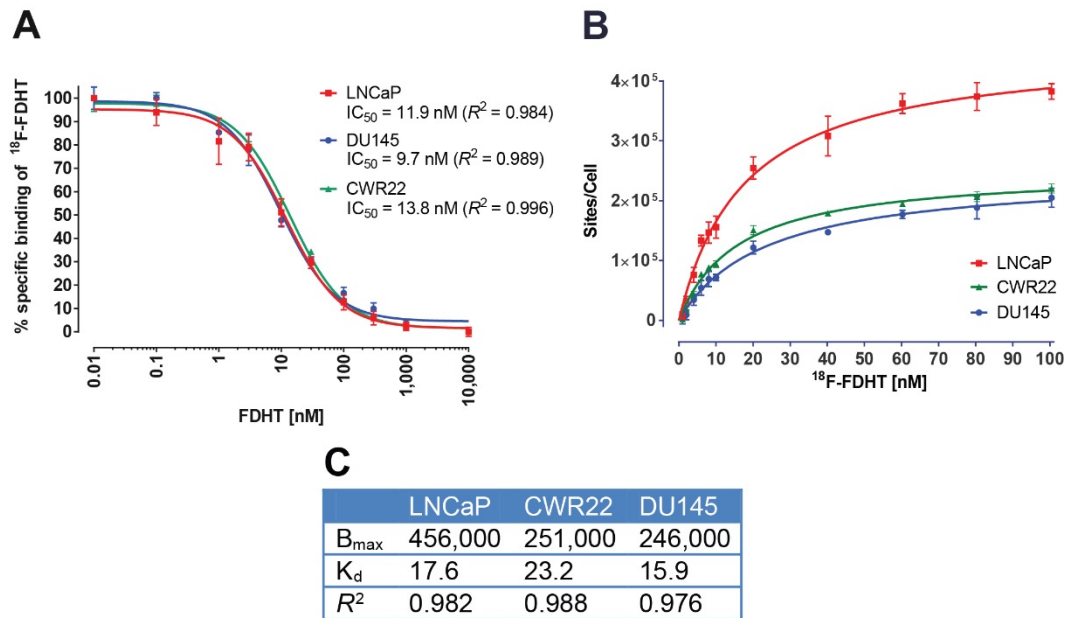

Supplemental Figure 1. Characterization of  $^{18}\text{F}$ -FDHT in LNCaP, DU145, and CWR22 cells. (A) Homologous competitive binding study and  $IC_{50}$  values obtained by non-linear regression analysis. (B) Saturation binding curves. (C) Binding parameters determined by non-linear regression analysis of data in (B).

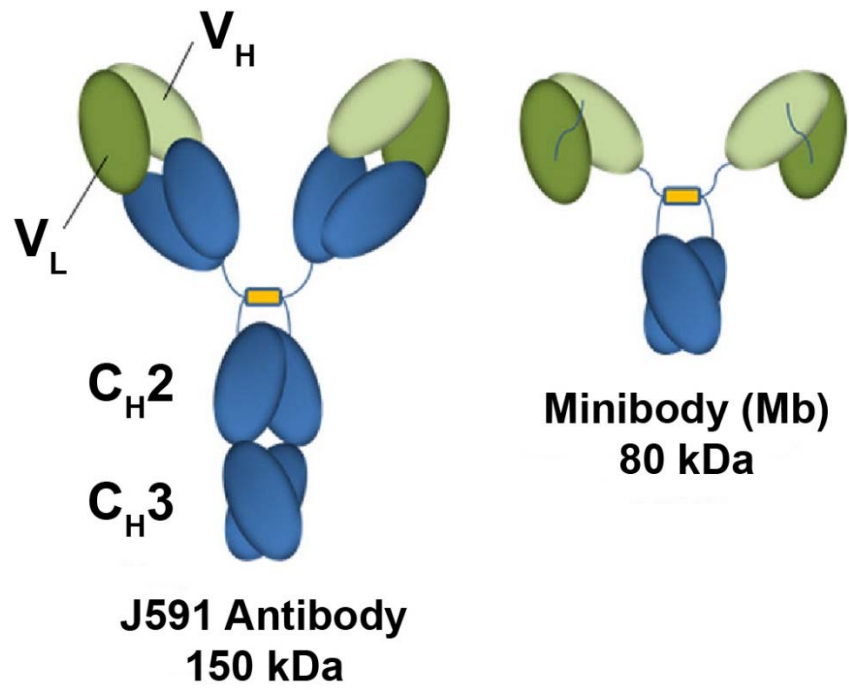

Supplemental Figure 2. Whole antibody (J591) vs. minibody (IAB2M).

Supplemental Table 1. Bayesian analysis for prediction of disease-positive sites

| Modality    | Tissue | Total positive sites on scans | Total # biopsied sites | Total biopsy+ lesions (out of total biopsies) | Total scan+ sites biopsied | Scan+ and biopsy+ | Total number unbiopsied sites that are scan+ | Estimated total number of biopsy+ sites out of unbiopsied scan+ group | 95% CI  |
|-------------|--------|-------------------------------|------------------------|-----------------------------------------------|----------------------------|-------------------|----------------------------------------------|-----------------------------------------------------------------------|---------|
| <b>J591</b> | Bone   | 491                           | 21                     | 18*                                           | 19                         | 18*               | 470                                          | 425                                                                   | 352-465 |
| <b>BS</b>   | Bone   | 339                           | 21                     | 18*                                           | 15                         | 14                | 318                                          | 281                                                                   | 220-314 |
| <b>CT</b>   | Bone   | 301                           | 21                     | 18*                                           | 16                         | 14                | 280                                          | 233                                                                   | 176-270 |
| <b>FDG</b>  | Bone   | 207                           | 21                     | 18*                                           | 16                         | 14                | 186                                          | 155                                                                   | 116-180 |
| <b>CT</b>   | Soft   | 124                           | 25                     | 22                                            | 20                         | 18                | 99                                           | 86                                                                    | 67-97   |
| <b>J591</b> | Soft   | 90                            | 25                     | 22                                            | 16                         | 14                | 65                                           | 54                                                                    | 40-64   |
| <b>FDG</b>  | Soft   | 88                            | 25                     | 22                                            | 15                         | 13                | 63                                           | 52                                                                    | 37-61   |

\*One site was initially negative on pathology, but showed progression on follow-up; repeat biopsy performed clinically was positive for disease.<sup>61</sup>

*Bayesian statistical analysis.* Since all of the patients underwent all of the scans, the Bayesian analysis best estimate and 95% confidence interval for detecting positive lesions should be the same if all the tests were equally accurate. However, the studies are ranked in order of J591>bone scan>CT>FDG for detecting bone lesions. In soft tissue, however, the order is CT>J591>FDG. The study and analysis provide a benchmark for comparing imaging performance of PSMA-targeting agents being proposed as prostate cancer imaging biomarkers.

*Radiolabeled Anti-PSMA Antibody as a Therapeutic:* PSMA has been explored as a target for therapy using  $^{90}\text{Y}$  or  $^{177}\text{Lu}$ -radiolabeled anti-PSMA antibodies. In animal models, radiolabeled J591 showed significant anti-tumor activity in PSMA-expressing human prostate cancer cells (i.e., LNCaP) and >80% cure in mice with fractionated dose of  $^{177}\text{Lu}$ -J591 (1). In a phase I dose escalation study, patients with androgen-independent prostate cancer were treated with doses of 370-2590 MBq/m<sup>2</sup> of  $^{177}\text{Lu}$  J591, or 10-70 mCi/m<sup>2</sup> (2). Sixteen patients received up to three doses. Dose-limiting activity or maximum tolerated dose was a single dose of 2590 MBq/m<sup>2</sup> (70 mCi/m<sup>2</sup>) beyond which myelosuppression was seen. PSA-based responses included progressive disease in 14 patients (PSA increase of  $\geq 25\%$ ) after treatment,  $\geq 50\%$  PSA declines in 4 patients lasting 3-8 months, and PSA stabilization in 16 patients (< 25% increase from baseline) of  $\geq 28$  days. The median duration of PSA stabilization was 60 days with a range of 28-601+ days. None of the 7 patients with measurable disease had an objective tumor response, nor a  $\geq 50\%$  PSA decline.

A phase II study in metastatic prostate cancer patients with a single infusion of 2405 or 2590 MBq/m<sup>2</sup> (65 or 70 mCi/m<sup>2</sup>) of  $^{177}\text{Lu}$ -labeled J591 (20 mg) assessed responses with PSA decline, changes in measurable disease, and survival analysis. Fifteen patients each were treated with a dose of 2405 MBq/m<sup>2</sup> (65 mCi/m<sup>2</sup>) or 2590 MBq/m<sup>2</sup> (70 mCi/m<sup>2</sup>). A PSA decline of 50% or more was seen in 10.6% of patients, while 36.2% had a 30% or more decline. Overall, a PSA decline of any level was seen in 59.6% of participants following a single treatment dose (3, 4). For therapeutic doses, the liver was found to be the critical organ receiving  $210 \pm 60.3$  cGy/GBq ( $7.77 \pm 2.23$  rads/mCi). The

bone marrow dose was estimated to be  $32 \pm 10.1$  cGy/GBq ( $1.17 \pm 0.37$  rads/mCi) based on the assumption that 36% of bone marrow volume represents plasma volume.

In an initial dose escalation study using  $^{90}\text{Y}$ -DOTA-HuJ591 (20 mg) as a therapeutic followed a week after imaging with  $^{111}\text{In}$ -DOTA-HuJ591 (185 MBq, or 5 mCi) for pharmacokinetic and biodistribution determinations, 29 subjects received doses varying from 185-740 MBq/m<sup>2</sup> (20 mCi/m<sup>2</sup>), with eligibility to receive three re-treatments based on adequate platelet and neutrophil recovery. The maximum tolerated dose level was 647.5 MBq/m<sup>2</sup> (17.5 mCi/m<sup>2</sup>) with two patients experiencing thrombocytopenia with non-life-threatening bleeding episodes requiring platelet transfusions at the higher dose of 740 MBq/m<sup>2</sup> (20 mCi/m<sup>2</sup>). No human anti-humanized antibody response was seen. About 21% of these patients experienced PSA stabilization (5).

These initial studies have provided proof of concept for the use of radiolabeled anti-PSMA targeting as a therapeutic. More recently, the concept is being explored with novel smaller molecules targeting PSMA.

## REFERENCES

1. Smith-Jones PM, Vallabhajosula S, Navarro V, Bastidas D, Goldsmith SJ, Bander NH. Radiolabeled monoclonal antibodies specific to the extracellular domain of prostate-specific membrane antigen: Preclinical studies in nude mice bearing LNCaP human prostate tumor. *J Nucl Med.* 2003;44:610-617.
2. Bander NH, Milowsky MI, Nanus DM, Kostakoglu L, Vallabhajosula S, Goldsmith SJ. Phase I trial of (177)lutetium-labeled J591, a monoclonal antibody

to prostate-specific membrane antigen, in patients with androgen-independent prostate cancer. *J Clin Oncol*. 2005;23:4591-4601.

3. Tagawa ST, Jeske S, Milowsky MI, et al. Phase II trial of (177)lutetium radiolabeled anti-prostate-specific membrane antigen (PSMA) monoclonal antibody J591 (Lu-177-J591) in patients (PTS) with metastatic castrate-resistant prostate cancer (metCRPC). *Cancer Biother Radiopharm*. 2008;23:525-525.
4. Tagawa ST, Milowsky MI, Morris M, et al. Phase II study of Lutetium-177-labeled anti-prostate-specific membrane antigen monoclonal antibody J591 for metastatic castration-resistant prostate cancer. *Clin Cancer Res*. 2013;19:5182-5191.
5. Milowsky MI, Nanus DM, Kostakoglu L, Vallabhajosula S, Goldsmith SJ, Bander NH. Phase I trial of yttrium-90-labeled anti-prostate-specific membrane antigen monoclonal antibody J591 for androgen-independent prostate cancer. *J Clin Oncol*. 2004;22:2522-2531.
